# Supplementary material for: Carbohydrate-Active Enzymes in Pythium and Their Role in Plant Cell Wall and Storage Polysaccharide Degradation
Source: PLoS One. 2013 Sep 12;8(9):e72572. doi: 10.1371/journal.pone.0072572 (PMC3772060; doi:10.1371/journal.pone.0072572)
Supplement: Table S2 — Expressed genes of Pythium CAZyome. (XLSX) [file pone.0072572.s003.xlsx]

## Sheet: Sheet1
Table S2. Expressed genes of Pythium CAZyome
Species	Number of predicted CAZymes	Expression support*
Pyar	397	309 (77.8%)
Pyir	347	272 (78.4%)
Pyiw	333	265 (79.6%)
Pyuu	407	407 (100%)
Pyve	389	313 (80.5%)
* Number of expressed genes and the percentage from the total number of CAZymes. Protein coding genes are considered expressed if FPKM value and the FPKM 95% confidence interval lower boundary was greater than 0.001 and zero, respectively. More details in Adhikari, et al. (companion paper, PLoS One, this issue).
